# Supplementary material
Source: publisher site journal article supplement (https://www.dovepress.com/article/177534)
Supplement: Supplementary file 1 [file get_supplementary_file.php%3Ff%3D177534.pdf]

## Supplementary materials

**Table S1** Demographic variables of included children and their parents

| Variable                                 | Children     | Parents      |
|------------------------------------------|--------------|--------------|
| Gender                                   |              |              |
| n                                        | 146          | 146          |
| % Female                                 | 69.9         | 76           |
| % Male                                   | 30.1         | 24           |
| Age                                      |              |              |
| n                                        | 146          | 133          |
| Mean (SD)                                | 14.55 (2.40) | 45.67 (5.74) |
| Min-Max                                  | 8.2-17.9     | 31-62        |
| Child chronic comorbid somatic condition |              |              |
| n                                        | 142          |              |
| % No                                     | 50.7         |              |
| % Don't know                             | 14.8         |              |
| % Yes                                    | 34.5         |              |
| Type: chronic comorbid condition         |              |              |
| n                                        | 44           |              |
| % Allergy/Asthma                         | 83           |              |
| % Other/single answers                   | 17           |              |
| Parental level of education              |              |              |
| n                                        |              | 133          |
| % Basic/High school                      |              | 41.4         |
| % University                             |              | 58.6         |
| Parental chronic pain                    |              |              |
| n                                        |              | 134          |
| % No                                     |              | 67.2         |
| % Yes                                    |              | 32.8         |
| Parental health (1-5)                    |              |              |
| n                                        |              | 134          |
| Mean (SD)                                |              | 3.60 (1.026) |
| % Poor (1)                               |              | 4.5          |
| % Reasonably good (2)                    |              | 9.7          |
| % Good (3)                               |              | 23.9         |
| % Very good (4)                          |              | 44.8         |
| % Excellent (5)                          |              | 17.2         |

**Table S2** Pain duration, frequency, and intensity, pain sites, perceived pain triggers, and perceived reasons for pain debut for included children

| Variable                                                      | % (n)      |
|---------------------------------------------------------------|------------|
| Pain duration (1-5)                                           |            |
| n=146                                                         |            |
| Mean (SD)=4.69 (.649)                                         |            |
| 1=Less than one month                                         | 0 (0)      |
| 2=1-3 months                                                  | 2.1 (3)    |
| 3=3-6 months                                                  | 4.1 (6)    |
| 4=6-12 months                                                 | 16.4 (24)  |
| 5=>12 months                                                  | 77.4 (113) |
| Pain frequency (1-5)                                          |            |
| n=146                                                         |            |
| Mean (SD)=4.58 (.769)                                         |            |
| 1=Once a month                                                | 0.7 (1)    |
| 2=2-3 times/month                                             | 3.4 (5)    |
| 3=Once a week                                                 | 2.7 (4)    |
| 4=Several times/week                                          | 24 (35)    |
| 5=Every day                                                   | 69.2 (101) |
| Pain site (Yes/No; multiple responses possible)               |            |
| n=146                                                         |            |
| ≥3 Pain sites                                                 | 74 (108)   |
| Headache                                                      | 79.5 (116) |
| Back pain                                                     | 61 (89)    |
| Stomach pain                                                  | 59.6 (87)  |
| Leg pain                                                      | 48.6 (71)  |
| Throat pain                                                   | 32.2 (47)  |
| Arm pain                                                      | 28.8 (42)  |
| Chest pain                                                    | 23.3 (34)  |
| Ear pain                                                      | 16.4 (24)  |
| Genital pain                                                  | 8.2 (12)   |
| Tooth ache                                                    | 8.2 (12)   |
| Other pain                                                    | 38.2 (55)  |
| Pain intensity (PI) <sup>a</sup>                              |            |
| n=140                                                         |            |
| Mean (SD)= 59.02 (13.55)                                      |            |
| Perceived pain triggers (Yes/No; multiple responses possible) |            |
| n=141                                                         |            |
| Don't know                                                    | 41.1 (58)  |
| Physical exercise                                             | 35.5 (50)  |
| School                                                        | 22 (31)    |
| Worry                                                         | 22 (31)    |

| Variable                                                                             | % (n)     |
|--------------------------------------------------------------------------------------|-----------|
| Sleep deprivation                                                                    | 16.3 (23) |
| School test/s                                                                        | 14.2 (20) |
| Weather condition/s                                                                  | 14.2 (20) |
| Cold (weather)                                                                       | 12.1 (17) |
| Noise                                                                                | 12.1 (17) |
| Anger/conflict                                                                       | 10.6 (15) |
| Sadness                                                                              | 10.6 (15) |
| Nothing                                                                              | 9.9 (14)  |
| Menstrual period                                                                     | 8.5 (12)  |
| Family situation                                                                     | 8.5 (12)  |
| Nutrition/Candy                                                                      | 5.7 (8)   |
| Loneliness                                                                           | 5 (7)     |
| Computer activity                                                                    | 4.3 (6)   |
| TV                                                                                   | 2.8 (4)   |
| New situations                                                                       | 2.8 (4)   |
| Other (pain itself, body parts)                                                      | 28.4 (40) |
| Perceived reason/s for pain debut (Yes/No; multiple responses possible)<br>n=144     |           |
| Don't know                                                                           | 35.4 (51) |
| Illness                                                                              | 22.9 (33) |
| Injury                                                                               | 16 (23)   |
| Physical exercise                                                                    | 13.9 (20) |
| Medical procedure                                                                    | 6.3 (9)   |
| Other (death of a family member, divorce, menstruation, unspecified)                 | 19.4 (28) |
| Did you receive a diagnosis for your pain condition?<br>(Yes/No/Don't know)<br>n=144 |           |
| Yes                                                                                  | 38.3 (54) |
| No                                                                                   | 34 (48)   |
| Don't know                                                                           | 27.7 (39) |

**Notes:** <sup>a</sup>Assessed with a visual analog scale (VAS) 0-100 mm.

**Abbreviations:** LPQ, Lübeck Pain Questionnaire.

**Table S3** Comparison on demographic variables between children below and above cutoff on the SRS for clinically significant autistic traits

| Variable                        | Below cutoff (n) | M±SD <sup>a</sup><br>Mdn (IQR) <sup>b</sup><br>Group % | Above cutoff (n) | M±SD <sup>a</sup><br>Mdn (IQR) <sup>b</sup><br>Group % | Test value                    | Sig.               | Effect size (d) |
|---------------------------------|------------------|--------------------------------------------------------|------------------|--------------------------------------------------------|-------------------------------|--------------------|-----------------|
| Child Age (years, months)       | 126              | 14.88 (4.1)                                            | 20               | 15.51 (2.1)                                            | U = 1177.500                  | n.s.               | .36             |
| Child gender (girls)            | 84               | 66.7%                                                  | 18               | 90%                                                    | $\chi^2$ (1, n = 146) = 4.463 | .035* <sup>c</sup> |                 |
| Comorbid chronic illness (Yes)  | 42               | 34.4%                                                  | 7                | 35%                                                    | $\chi^2$ (2, n = 142) = .005  | n.s.               | .46             |
| Parent age (years)              | 113              | 45.97±5.680                                            | 20               | 43.95±5.942                                            | t (131)=1.46                  | n.s.               |                 |
| Parent gender (mothers)         | 96               | 76.2%                                                  | 15               | 70%                                                    | $\chi^2$ (1, n = 146) = .908  | n.s.               | .46             |
| Parental education (university) | 69               | 61.1%                                                  | 9                | 45%                                                    | $\chi^2$ (1, n = 133) = 1.808 | n.s.               |                 |
| Parental health (1-5)           | 114              | 4 (1)                                                  | 20               | 3 (2)                                                  | U = 787.500                   | .020*              | .46             |
| Parental chronic pain (Yes)     | 35               | 30.7%                                                  | 9                | 45%                                                    | $\chi^2$ (1, n = 134) = 1.577 | n.s.               |                 |

**Notes:** <sup>a</sup>M±SD=Mean±Standard deviation; <sup>b</sup>Mdn (IQR)=Median (Inter Quartile Range); \*p< .05; <sup>c</sup>Confirmed with Fisher's Exact test (2-sided) .037\*.

**Abbreviations:** SRS, Social Responsiveness Scale.

**Table S4** Comparison on pain variables between children below and above cutoff for clinically significant autistic traits on the SRS

| Variable                  | Below cutoff (n) | M±SD <sup>a</sup><br>Mdn (IQR) <sup>b</sup><br>Group % | Above cutoff (n) | M±SD <sup>a</sup><br>Mdn (IQR) <sup>b</sup><br>Group % | Test value                    | Sig.   | Effect size (d) |  |
|---------------------------|------------------|--------------------------------------------------------|------------------|--------------------------------------------------------|-------------------------------|--------|-----------------|--|
| Pain intensity (0-100)    | 126              | 58.83±13.699                                           | 20               | 60.15±12.910                                           | t (138)=-.401                 | n.s.   | .46             |  |
| Pain duration (1-5)       | 126              | 5 (0)                                                  | 20               | 5 (0)                                                  | U =1234.000                   | n.s.   |                 |  |
| Pain frequency (1-5)      | 126              | 5 (1)                                                  | 20               | 5 (1)                                                  | U =1190.500                   | n.s.   |                 |  |
| Pain site/s               |                  |                                                        |                  |                                                        |                               |        |                 |  |
| Headache (Yes)            | 99               | 78.6%                                                  | 18               | 90%                                                    | $\chi^2$ (1, n = 146) = 1.416 | n.s.   |                 |  |
| Back pain (Yes)           | 76               | 60.3%                                                  | 13               | 65%                                                    | $\chi^2$ (1, n = 146) = .159  | n.s.   |                 |  |
| Arm pain (Yes)            | 35               | 27.8%                                                  | 7                | 35%                                                    | $\chi^2$ (1, n = 146) = .439  | n.s.   |                 |  |
| Leg pain (Yes)            | 60               | 47.6%                                                  | 11               | 55%                                                    | $\chi^2$ (1, n = 146) = .376  | n.s.   |                 |  |
| Ear pain (Yes)            | 19               | 15.1%                                                  | 5                | 25%                                                    | $\chi^2$ (1, n = 146) = 1.237 | n.s.   |                 |  |
| Stomach pain (Yes)        | 73               | 57.9%                                                  | 14               | 70%                                                    | $\chi^2$ (1, n = 146) = 1.043 | n.s.   |                 |  |
| Chest pain (Yes)          | 27               | 21.4%                                                  | 7                | 35%                                                    | $\chi^2$ (1, n = 146) = 1.780 | n.s.   |                 |  |
| Throat pain (Yes)         | 38               | 30.2%                                                  | 9                | 45%                                                    | $\chi^2$ (1, n = 146) = 1.742 | n.s.   |                 |  |
| Genital pain (Yes)        | 10               | 7.9%                                                   | 2                | 10%                                                    | $\chi^2$ (1, n = 146) = .097  | n.s.   |                 |  |
| Toothache (Yes)           | 9                | 7.1%                                                   | 3                | 15%                                                    | $\chi^2$ (1, n = 146) = 1.413 | n.s.   |                 |  |
| Other pain (Yes)          | 48               | 38.1%                                                  | 8                | 40%                                                    | $\chi^2$ (1, n = 146) = .026  | n.s.   |                 |  |
| Pain trigger/s            |                  |                                                        |                  |                                                        |                               |        |                 |  |
| Weather condition/s (Yes) | 16               | 13.2%                                                  | 4                | 20%                                                    | $\chi^2$ (1, n = 141) = .648  | n.s.   |                 |  |
| Anger/Conflict (Yes)      | 13               | 10.7%                                                  | 2                | 10%                                                    | $\chi^2$ (1, n = 141) = .010  | n.s.   |                 |  |
| School (Yes)              | 22               | 18.2%                                                  | 9                | 45%                                                    | $\chi^2$ (1, n = 141) = 7.197 | .007** |                 |  |
| Worry (Yes)               | 24               | 19.8%                                                  | 7                | 35%                                                    | $\chi^2$ (1, n = 141) = 2.301 | n.s.   |                 |  |
| Sadness (Yes)             | 14               | 11.6%                                                  | 1                | 5%                                                     | $\chi^2$ (1, n = 141) = .779  | n.s.   |                 |  |
| New situations (Yes)      | 4                | 3.3%                                                   | 0                | 0%                                                     | $\chi^2$ (1, n = 141) = .680  | n.s.   |                 |  |
| Nutrition/Candy (Yes)     | 5                | 4.1%                                                   | 3                | 15%                                                    | $\chi^2$ (1, n = 141) = 3.788 | n.s.   |                 |  |

| Variable                                  | Below cutoff (n) | M±SD <sup>a</sup><br>Mdn (IQR) <sup>b</sup><br>Group % | Above cutoff (n) | M±SD <sup>a</sup><br>Mdn (IQR) <sup>b</sup><br>Group % | Test value                    | Sig.   | Effect size (d) |
|-------------------------------------------|------------------|--------------------------------------------------------|------------------|--------------------------------------------------------|-------------------------------|--------|-----------------|
| Sleep deprivation (Yes)                   | 21               | 17.4%                                                  | 2                | 10%                                                    | $\chi^2 (1, n = 141) = .680$  | n.s.   |                 |
| Cold (weather) (Yes)                      | 13               | 10.8%                                                  | 4                | 20%                                                    | $\chi^2 (1, n = 141) = 1.350$ | n.s.   |                 |
| TV (Yes)                                  | 3                | 2.5%                                                   | 1                | 5%                                                     | $\chi^2 (1, n = 141) = .396$  | n.s.   |                 |
| Loneliness (Yes)                          | 6                | 5%                                                     | 1                | 5%                                                     | $\chi^2 (1, n = 141) = .000$  | n.s.   |                 |
| Menstrual period (Yes)                    | 9                | 7.4%                                                   | 3                | 15%                                                    | $\chi^2 (1, n = 141) = 1.260$ | n.s.   |                 |
| Noise (Yes)                               | 15               | 12.4%                                                  | 2                | 10%                                                    | $\chi^2 (1, n = 141) = 1.260$ | n.s.   |                 |
| Family situation (Yes)                    | 11               | 9.1%                                                   | 1                | 5%                                                     | $\chi^2 (1, n = 141) = .369$  | n.s.   |                 |
| Computer activity (Yes)                   | 5                | 4.1%                                                   | 1                | 5%                                                     | $\chi^2 (1, n = 141) = .032$  | n.s.   |                 |
| School test/s (Yes)                       | 17               | 14%                                                    | 3                | 15%                                                    | $\chi^2 (1, n = 141) = .013$  | n.s.   |                 |
| Physical exercise (Yes)                   | 44               | 36.4%                                                  | 6                | 30%                                                    | $\chi^2 (1, n = 141) = .304$  | n.s.   |                 |
| Nothing (Yes)                             | 12               | 9.9%                                                   | 2                | 10%                                                    | $\chi^2 (1, n = 141) = .000$  | n.s.   |                 |
| Other (pain itself, body parts) (Yes)     | 33               | 27.3%                                                  | 7                | 35%                                                    | $\chi^2 (1, n = 141) = .504$  | n.s.   |                 |
| Don't know (Yes)                          | 52               | 43%                                                    | 6                | 30%                                                    | $\chi^2 (1, n = 141) = 1.193$ | n.s.   |                 |
| Perceived reason/s for pain debut         |                  |                                                        |                  |                                                        |                               |        |                 |
| Injury (Yes)                              | 23               | 18.5%                                                  | 0                | 0%                                                     | $\chi^2 (1, n = 144) = 4.415$ | n.s.   |                 |
| Medical procedure (Yes)                   | 9                | 7.3%                                                   | 0                | 0%                                                     | $\chi^2 (1, n = 144) = 1.548$ | n.s.   |                 |
| Illness (Yes)                             | 27               | 21.8%                                                  | 6                | 30%                                                    | $\chi^2 (1, n = 144) = .660$  | n.s.   |                 |
| Physical exercise (Yes)                   | 17               | 13.7%                                                  | 3                | 15%                                                    | $\chi^2 (1, n = 144) = .024$  | n.s.   |                 |
| Other (see Table S2 for definition) (Yes) | 21               | 16.9%                                                  | 1                | 5%                                                     | $\chi^2 (1, n = 144) = 1.895$ | n.s.   |                 |
| Don't know (Yes)                          | 38               | 30.6%                                                  | 13               | 65%                                                    | $\chi^2 (1, n = 144) = 8.887$ | .003** | .52             |

**Notes:** <sup>a</sup>M±SD=Mean±Standard deviation; <sup>b</sup>Mdn (IQR)=Median (Inter Quartile Range); \*p< .05;\*\*p< .01.

**Abbreviations:** SRS, Social Responsiveness Scale.

**Table S5** Comparison on demographic variables between children below and above cutoff on the C3 Index for clinically significant traits of ADHD

| Variable                        | Below cutoff (n) | M±SD <sup>a</sup><br>Mdn (IQR) <sup>b</sup><br>Group % | Above cutoff (n) | M±SD <sup>a</sup><br>Mdn (IQR) <sup>b</sup><br>Group % | Test value                    | Sig.  | Effect size (d) |
|---------------------------------|------------------|--------------------------------------------------------|------------------|--------------------------------------------------------|-------------------------------|-------|-----------------|
| Child Age (years, months)       | 117              | 14.69 (3.6)                                            | 29               | 15.33 (3)                                              | U = 1543.500                  | n.s.  | 0.37            |
| Child gender (girls)            | 82               | 70.1%                                                  | 20               | 69%                                                    | $\chi^2$ (1, n = 146) = .014  | n.s.  |                 |
| Comorbid chronic illness (Yes)  | 38               | 33.6%                                                  | 11               | 37.9%                                                  | $\chi^2$ (2, n = 142) = .191  | n.s.  |                 |
| Parent age (years)              | 106              | 45.48±5.509                                            | 27               | 46.41±6.646                                            | t (131)=-.75                  | n.s.  |                 |
| Parent gender (mothers)         | 88               | 75.2%                                                  | 23               | 79.3%                                                  | $\chi^2$ (1, n = 146) = .214  | n.s.  |                 |
| Parental education (university) | 67               | 63.2%                                                  | 11               | 40.7%                                                  | $\chi^2$ (1, n = 133) = 4.479 | .034* |                 |
| Parental health (1-5)           | 114              | 4 (1)                                                  | 20               | 4 (1)                                                  | U =1369.000                   | n.s.  |                 |
| Parental chronic pain (Yes)     | 35               | 32.7%                                                  | 9                | 33.3%                                                  | $\chi^2$ (1, n = 134) = .004  | n.s.  |                 |

**Notes:** <sup>a</sup>M±SD=Mean±Standard deviation; <sup>b</sup>Mdn (IQR)=Median (Inter Quartile Range);\*p< .05.

**Abbreviations:** C3, Conners-3.

**Table S6** Comparison on pain variables between children below and above cutoff on the C3 Index for clinically significant traits of ADHD

| Variable                  | Below cutoff (n=) | M±SD <sup>a</sup><br>Mdn (IQR) <sup>b</sup><br>Group % | Above cutoff (n=) | M±SD <sup>a</sup><br>Mdn (IQR) <sup>b</sup><br>Group % | Test value                    | Sig.     | Effect size (d) |
|---------------------------|-------------------|--------------------------------------------------------|-------------------|--------------------------------------------------------|-------------------------------|----------|-----------------|
| Pain intensity (0-100)    | 111               | 58.95±12.841                                           | 29                | 59.31±16.242                                           | t (138)=-.128                 | n.s.     |                 |
| Pain duration (1-5)       | 117               | 5 (0)                                                  | 29                | 5 (1)                                                  | U =1635.500                   | n.s.     |                 |
| Pain frequency (1-5)      | 117               | 5 (1)                                                  | 29                | 5 (1)                                                  | U =1538.000                   | n.s.     |                 |
| Pain site/s               |                   |                                                        |                   |                                                        |                               |          |                 |
| Headache (Yes)            | 92                | 78.6%                                                  | 25                | 86.2%                                                  | $\chi^2$ (1, n = 146) = .838  | n.s.     |                 |
| Back pain (Yes)           | 70                | 59.8%                                                  | 19                | 65.5%                                                  | $\chi^2$ (1, n = 146) = .316  | n.s.     |                 |
| Arm pain (Yes)            | 31                | 26.5%                                                  | 11                | 37.9%                                                  | $\chi^2$ (1, n = 146) = .1483 | n.s.     |                 |
| Leg pain (Yes)            | 54                | 46.2%                                                  | 17                | 58.6%                                                  | $\chi^2$ (1, n = 146) = 1.446 | n.s.     |                 |
| Ear pain (Yes)            | 18                | 15.4%                                                  | 6                 | 20.7%                                                  | $\chi^2$ (1, n = 146) = .476  | n.s.     |                 |
| Stomach pain (Yes)        | 67                | 57.3%                                                  | 20                | 69%                                                    | $\chi^2$ (1, n = 146) = 1.321 | n.s.     |                 |
| Chest pain (Yes)          | 23                | 19.7%                                                  | 11                | 37.9%                                                  | $\chi^2$ (1, n = 146) = 4.344 | n.s.     |                 |
| Throat pain (Yes)         | 36                | 30.8%                                                  | 11                | 37.9%                                                  | $\chi^2$ (1, n = 146) = .546  | n.s.     |                 |
| Genital pain (Yes)        | 10                | 8.5%                                                   | 2                 | 6.9%                                                   | $\chi^2$ (1, n = 146) = .084  | n.s.     |                 |
| Toothache (Yes)           | 9                 | 7.7%                                                   | 3                 | 10.3%                                                  | $\chi^2$ (1, n = 146) = .217  | n.s.     |                 |
| Other pain (Yes)          | 45                | 38.5%                                                  | 11                | 37.9%                                                  | $\chi^2$ (1, n = 146) = .003  | n.s.     |                 |
| Pain trigger/s            |                   |                                                        |                   |                                                        |                               |          |                 |
| Weather condition/s (Yes) | 16                | 14.3%                                                  | 4                 | 13.8%                                                  | $\chi^2$ (1, n = 141) = .005  | n.s.     |                 |
| Anger/Conflict (Yes)      | 12                | 10.7%                                                  | 3                 | 10.3%                                                  | $\chi^2$ (1, n = 141) = .003  | n.s.     |                 |
| School (Yes)              | 21                | 18.8%                                                  | 10                | 34.5%                                                  | $\chi^2$ (1, n = 141) = 3.324 | n.s.     |                 |
| Worry (Yes)               | 21                | 18.8%                                                  | 10                | 34.5%                                                  | $\chi^2$ (1, n = 141) = 3.324 | n.s.     |                 |
| Sadness (Yes)             | 11                | 9.8%                                                   | 4                 | 13.8%                                                  | $\chi^2$ (1, n = 141) = .382  | n.s.     |                 |
| New situations (Yes)      | 1                 | 0.9%                                                   | 3                 | 10.3%                                                  | $\chi^2$ (1, n = 141) = 7.466 | .006** c | .47             |



| Variable                                  | Below cutoff (n=) | M±SD <sup>a</sup><br>Mdn (IQR) <sup>b</sup><br>Group % | Above cutoff (n=) | M±SD <sup>a</sup><br>Mdn (IQR) <sup>b</sup><br>Group % | Test value                    | Sig.   | Effect size (d) |  |
|-------------------------------------------|-------------------|--------------------------------------------------------|-------------------|--------------------------------------------------------|-------------------------------|--------|-----------------|--|
| Nutrition/Candy (Yes)                     | 4                 | 3.6%                                                   | 4                 | 13.8%                                                  | $\chi^2 (1, n = 141) = 4.497$ | .n.s.  | .46             |  |
| Sleep deprivation (Yes)                   | 18                | 16.1%                                                  | 5                 | 17.2%                                                  | $\chi^2 (1, n = 141) = .023$  | n.s.   |                 |  |
| Cold (weather) (Yes)                      | 11                | 9.9%                                                   | 6                 | 20.7%                                                  | $\chi^2 (1, n = 141) = 2.504$ | n.s.   |                 |  |
| TV (Yes)                                  | 2                 | 1.8%                                                   | 2                 | 6.9%                                                   | $\chi^2 (1, n = 141) = 2.183$ | n.s.   |                 |  |
| Loneliness (Yes)                          | 4                 | 3.6%                                                   | 3                 | 10.3%                                                  | $\chi^2 (1, n = 141) = 2.240$ | n.s.   |                 |  |
| Menstrual period (Yes)                    | 9                 | 8%                                                     | 3                 | 10.3%                                                  | $\chi^2 (1, n = 141) = .158$  | n.s.   |                 |  |
| Noise (Yes)                               | 11                | 9.8%                                                   | 6                 | 20.7%                                                  | $\chi^2 (1, n = 141) = 2.566$ | n.s.   |                 |  |
| Family situation (Yes)                    | 6                 | 5.4%                                                   | 6                 | 20.7%                                                  | $\chi^2 (1, n = 141) = 6.955$ | .008** |                 |  |
| Computer activity (Yes)                   | 4                 | 3.6%                                                   | 2                 | 6.9%                                                   | $\chi^2 (1, n = 141) = .625$  | n.s.   |                 |  |
| School test/s (Yes)                       | 14                | 12.5%                                                  | 6                 | 20.7%                                                  | $\chi^2 (1, n = 141) = 1.269$ | n.s.   |                 |  |
| Physical exercise (Yes)                   | 42                | 37.5%                                                  | 8                 | 27.6%                                                  | $\chi^2 (1, n = 141) = .989$  | n.s.   |                 |  |
| Nothing (Yes)                             | 14                | 12.5%                                                  | 0                 | 0%                                                     | $\chi^2 (1, n = 141) = 4.025$ | n.s.   |                 |  |
| Other (pain itself, body parts) (Yes)     | 32                | 28.6%                                                  | 8                 | 27.6%                                                  | $\chi^2 (1, n = 141) = .011$  | n.s.   |                 |  |
| Don't know (Yes)                          | 48                | 42.9%                                                  | 10                | 34.5%                                                  | $\chi^2 (1, n = 141) = .667$  | n.s.   |                 |  |
| Perceived reason/s for pain debut         |                   |                                                        |                   |                                                        |                               |        |                 |  |
| Injury (Yes)                              | 18                | 15.7%                                                  | 5                 | 17.2%                                                  | $\chi^2 (1, n = 144) = .044$  | n.s.   |                 |  |
| Medical procedure (Yes)                   | 9                 | 7.8%                                                   | 0                 | 0%                                                     | $\chi^2 (1, n = 144) = 2.421$ | n.s.   |                 |  |
| Illness (Yes)                             | 25                | 21.7%                                                  | 8                 | 27.6%                                                  | $\chi^2 (1, n = 144) = .448$  | n.s.   |                 |  |
| Physical exercise (Yes)                   | 16                | 13.9%                                                  | 4                 | 13.8%                                                  | $\chi^2 (1, n = 144) = .000$  | n.s.   |                 |  |
| Other (see Table S2 for definition) (Yes) | 18                | 15.7%                                                  | 4                 | 13.8%                                                  | $\chi^2 (1, n = 144) = .062$  | n.s.   |                 |  |
| Don't know (Yes)                          | 41                | 35.7%                                                  | 10                | 34.5%                                                  | $\chi^2 (1, n = 144) = .014$  | n.s.   |                 |  |

**Notes:** <sup>a</sup>M±SD=Mean±Standard deviation; <sup>b</sup>Mdn (IQR)=Median (Inter Quartile Range); \*p< .05;\*\*p< .01; <sup>c</sup>Confirmed with Fisher's Exact test (2-sided) .027\*.

**Abbreviations:** C3, Connors-3.
